# Supplementary material for: Quantitative estimated exposure to vinyl chloride and risk of angiosarcoma of the liver and hepatocellular cancer in the US industry-wide vinyl chloride cohort: mortality update through 2013
Source: PubMed Central journal article supplement — Occup Environ Med. 2017 May 10;74(10):709–16. doi: 10.1136/oemed-2016-104051 (PMC5629943; doi:10.1136/oemed-2016-104051), 2017-05-10
Supplement: oemed-2016-104051supp002.pdf [file oemed-2016-104051supp002.pdf]

Supplemental Table S.1. Observed and expected deaths, standardized mortality ratios, and 95% confidence intervals for selected causes\*

| Cause of death                         | Inception subcohort (n=7,273) <sup>†</sup> |        |             |                  | Inception subcohort, follow up beginning in 1973 (n=6,701) <sup>†</sup> |        |             |                  |
|----------------------------------------|--------------------------------------------|--------|-------------|------------------|-------------------------------------------------------------------------|--------|-------------|------------------|
|                                        | O                                          | E      | SMR         | 95% CI           | O                                                                       | E      | SMR         | 95% CI           |
| All causes                             | 3882                                       | 4489.4 | <b>0.86</b> | <b>0.84–0.89</b> | 3441                                                                    | 3921.8 | <b>0.88</b> | <b>0.85–0.91</b> |
| All malignant neoplasms                | 1166                                       | 1216.8 | <b>0.96</b> | 0.90–1.01        | 1076                                                                    | 1123.5 | <b>0.96</b> | 0.90–1.02        |
| Oral cavity and pharynx                | 26                                         | 24.6   | <b>1.06</b> | 0.69–1.55        | 20                                                                      | 21.3   | <b>0.94</b> | 0.57–1.45        |
| Esophagus                              | 42                                         | 34.5   | <b>1.22</b> | 0.88–1.65        | 39                                                                      | 32.7   | <b>1.19</b> | 0.85–1.63        |
| Stomach                                | 23                                         | 30.0   | <b>0.77</b> | 0.49–1.15        | 21                                                                      | 25.5   | <b>0.82</b> | 0.51–1.26        |
| Intestine except rectum                | 72                                         | 96.5   | <b>0.75</b> | <b>0.58–0.94</b> | 69                                                                      | 89.8   | <b>0.77</b> | <b>0.60–0.97</b> |
| Rectum                                 | 24                                         | 20.5   | <b>1.17</b> | 0.75–1.74        | 23                                                                      | 18.1   | <b>1.27</b> | 0.80–1.91        |
| Liver, biliary passages & gall bladder | 78                                         | 32.8   | <b>2.37</b> | <b>1.88–2.96</b> | 72                                                                      | 30.2   | <b>2.38</b> | <b>1.86–3.00</b> |
| Liver only ‡                           | 70                                         | 22.3   | <b>3.14</b> | <b>2.45–3.97</b> | 65                                                                      | 21.1   | <b>3.08</b> | <b>2.38–3.93</b> |
| Pancreas                               | 55                                         | 58.0   | <b>0.95</b> | 0.71–1.23        | 53                                                                      | 53.4   | <b>0.99</b> | 0.74–1.30        |
| Larynx                                 | 8                                          | 14.9   | <b>0.54</b> | 0.23–1.06        | 6                                                                       | 13.5   | <b>0.45</b> | <b>0.16–0.97</b> |
| Trachea, bronchus, lung                | 425                                        | 476.8  | <b>0.89</b> | <b>0.81–0.98</b> | 397                                                                     | 446.4  | <b>0.89</b> | <b>0.80–0.98</b> |
| Pleura                                 | 3                                          | 0.8    | <b>3.89</b> | 0.80–11.36       | 2                                                                       | 0.7    | <b>2.77</b> | 0.34–10.01       |
| Breast                                 | 2                                          | 1.4    | <b>1.41</b> | 0.17–5.10        | 2                                                                       | 1.3    | <b>1.57</b> | 0.19–5.65        |
| Prostate                               | 72                                         | 83.7   | <b>0.86</b> | 0.67–1.08        | 71                                                                      | 80.9   | <b>0.88</b> | 0.69–1.11        |
| Kidney                                 | 37                                         | 31.6   | <b>1.17</b> | 0.82–1.61        | 33                                                                      | 29.2   | <b>1.13</b> | 0.78–1.59        |
| Bladder & other urinary organs         | 36                                         | 31.2   | <b>1.15</b> | 0.81–1.60        | 34                                                                      | 29.4   | <b>1.16</b> | 0.80–1.62        |
| Bone                                   | 3                                          | 3.3    | <b>0.90</b> | 0.18–2.62        | 2                                                                       | 2.4    | <b>0.82</b> | 0.10–2.96        |
| Melanoma                               | 18                                         | 19.4   | <b>0.93</b> | 0.55–1.47        | 17                                                                      | 17.4   | <b>0.98</b> | 0.57–1.57        |
| Skin                                   | 3                                          | 6.3    | <b>0.48</b> | 0.10–1.39        | 2                                                                       | 5.8    | <b>0.35</b> | 0.04–1.25        |
| Mesothelioma                           | 9                                          | 3.9    | <b>2.28</b> | <b>1.04–4.33</b> | 9                                                                       | 3.9    | <b>2.28</b> | <b>1.04–4.33</b> |
| Connective tissue                      | 12                                         | 5.9    | <b>2.05</b> | <b>1.06–3.58</b> | 10                                                                      | 5.3    | <b>1.88</b> | 0.90–3.46        |
| Brain and Central Nervous System       | 38                                         | 29.5   | <b>1.29</b> | 0.91–1.77        | 31                                                                      | 25.2   | <b>1.23</b> | 0.83–1.74        |
| Eye                                    | 2                                          | 0.7    | <b>2.98</b> | 0.36–10.75       | 2                                                                       | 0.5    | <b>3.84</b> | 0.46–13.86       |
| Thyroid                                | 2                                          | 2.2    | <b>0.89</b> | 0.11–3.23        | 1                                                                       | 2.0    | <b>0.50</b> | 0.01–2.79        |
| Other & unspecified malignancy         | 59                                         | 86.6   | <b>0.68</b> | <b>0.52–0.88</b> | 56                                                                      | 80.8   | <b>0.69</b> | <b>0.52–0.90</b> |
| Hodgkin's disease                      | 3                                          | 5.6    | <b>0.53</b> | 0.11–1.56        | 1                                                                       | 3.2    | <b>0.31</b> | 0.01–1.73        |
| Non Hodgkin lymphoma                   | 40                                         | 43.9   | <b>0.91</b> | 0.65–1.24        | 35                                                                      | 40.4   | <b>0.87</b> | 0.60–1.21        |
| Multiple myeloma                       | 20                                         | 19.5   | <b>1.03</b> | 0.63–1.59        | 20                                                                      | 18.5   | <b>1.08</b> | 0.66–1.67        |

| Cause of death                             | Inception subcohort (n=7,273) <sup>†</sup> |        |             |                  | Inception subcohort, follow up beginning in 1973 (n=6,701) <sup>†</sup> |              |             |                  |
|--------------------------------------------|--------------------------------------------|--------|-------------|------------------|-------------------------------------------------------------------------|--------------|-------------|------------------|
|                                            | O                                          | E      | SMR         | 95% CI           | O                                                                       | E            | SMR         | 95% CI           |
| Leukemia & Aleukemia                       | 46                                         | 44.2   | <b>1.04</b> | 0.76–1.39        | 41                                                                      | 39.3         | <b>1.04</b> | 0.75–1.42        |
| Benign and unspecified neoplasms           | 9                                          | 14.6   | <b>0.62</b> | 0.28–1.17        | 4                                                                       | 6.8          | <b>0.59</b> | 0.16–1.50        |
| Diseases of blood and blood forming organs | 13                                         | 17.2   | <b>0.76</b> | 0.40–1.30        | 12                                                                      | 15.9         | <b>0.75</b> | 0.39–1.32        |
| Diabetes                                   | 94                                         | 106.6  | <b>0.88</b> | 0.71–1.08        | 88                                                                      | 99.1         | <b>0.89</b> | 0.71–1.09        |
| Nervous system and sense organs            | 98                                         | 91.4   | <b>1.07</b> | 0.87–1.31        | 94                                                                      | 86.3         | <b>1.09</b> | 0.88–1.33        |
| Diseases of the heart                      | 1276                                       | 1501.9 | <b>0.85</b> | <b>0.80–0.90</b> | 1096                                                                    | 1296.7       | <b>0.85</b> | <b>0.80–0.90</b> |
| Cerebrovascular disease                    | 185                                        | 210.1  | <b>0.88</b> | 0.76–1.02        | 164                                                                     | 181.2        | <b>0.91</b> | 0.77–1.05        |
| Diseases of the respiratory system         | 297                                        | 408.5  | <b>0.73</b> | <b>0.65–0.81</b> | 282                                                                     | 379.8        | <b>0.74</b> | <b>0.66–0.83</b> |
| Chronic Obstructive Pulmonary Disease      | 180                                        | 236.1  | <b>0.76</b> | <b>0.66–0.88</b> | 171                                                                     | 226.8        | <b>0.75</b> | <b>0.65–0.88</b> |
| Asbestosis                                 | 1                                          | 1.6    | <b>0.61</b> | 0.02–3.42        | 1                                                                       | 1.6          | <b>0.62</b> | 0.02–3.43        |
| Diseases of the digestive system           | 129                                        | 172.1  | <b>0.75</b> | <b>0.63–0.89</b> | 117                                                                     | 143.5        | <b>0.82</b> | <b>0.67–0.98</b> |
| Cirrhosis & other chronic liver disease    | 65                                         | 78.8   | <b>0.82</b> | 0.64–1.05        | 59                                                                      | 64.2         | <b>0.92</b> | 0.70–1.19        |
| Diseases of genitourinary                  | 61                                         | 77.6   | <b>0.79</b> | 0.60–1.01        | 59                                                                      | 69.4         | <b>0.85</b> | 0.65–1.10        |
| Diseases of skin and subcutaneous tissue   | 4                                          | 4.0    | <b>1.00</b> | 0.27–2.56        | 4                                                                       | 3.5          | <b>1.15</b> | 0.31–2.94        |
| Symptoms and ill-defined conditions        | 32                                         | 41.3   | <b>0.77</b> | 0.53–1.09        | 30                                                                      | 33.3         | <b>0.90</b> | 0.61–1.29        |
| External causes                            | 243                                        | 336.1  | <b>0.72</b> | <b>0.63–0.82</b> | <b>167</b>                                                              | <b>216.2</b> | <b>0.77</b> | <b>0.66–0.90</b> |

\* NIOSH state-specific referent rates used unless otherwise noted.

<sup>†</sup>299,747 person-years for inception subcohort of 7,273 workers, 205,108 person-years for subcohort of 6,701 workers.

<sup>‡</sup> NCHS/CanQues state referent rates used.

Abbreviations: O, observed; E, expected; SMR, standardized mortality ratio; CI, confidence interval.

Supplemental Table S.2. Cox proportional hazards ratios for selected causes of death by cumulative exposure\* to vinyl chloride in inception subcohort, n=7,273.†

| Cumulative exposure, ppm-years | Melanoma, n=18 |            |         | Brain cancer, n=38 |            |         | Lung cancer, n=425 |            |         | NHL, n=40 |            |         |
|--------------------------------|----------------|------------|---------|--------------------|------------|---------|--------------------|------------|---------|-----------|------------|---------|
|                                | n              | HR         | 95% CI  | n                  | HR         | 95% CI  | n                  | HR         | 95% CI  | n         | HR         | 95% CI  |
| <63                            | 3              | <b>ref</b> |         | 7                  | <b>ref</b> |         | 69                 | <b>ref</b> |         | 11        | <b>ref</b> |         |
| 63- <287                       | 5              | <b>1.6</b> | 0.4–6.7 | 10                 | <b>1.4</b> | 0.5–3.6 | 98                 | <b>1.4</b> | 1.0–1.9 | 4         | <b>0.4</b> | 0.1–1.1 |
| 287- <865                      | 4              | <b>1.2</b> | 0.3–5.1 | 10                 | <b>1.3</b> | 0.5–3.4 | 92                 | <b>1.2</b> | 0.9–1.6 | 7         | <b>0.6</b> | 0.2–1.4 |
| 865- <2,271                    | 3              | <b>0.9</b> | 0.3–4.2 | 4                  | <b>0.5</b> | 0.2–1.8 | 96                 | <b>1.2</b> | 0.9–1.7 | 9         | <b>0.7</b> | 0.3–1.7 |
| ≥2,271                         | 3              | <b>0.9</b> | 0.3–4.5 | 7                  | <b>1.1</b> | 0.4–3.1 | 70                 | <b>1.0</b> | 0.7–1.4 | 9         | <b>0.8</b> | 0.3–1.8 |

  

| Cumulative exposure, ppm-years | Connective and soft tissue cancers, n=12 |            |          | Cirrhosis of the liver, n=65 |            |         | NMRD, n=297 |            |         | COPD, n=180 |            |         |
|--------------------------------|------------------------------------------|------------|----------|------------------------------|------------|---------|-------------|------------|---------|-------------|------------|---------|
|                                | n                                        | HR         | 95% CI   | n                            | HR         | 95% CI  | n           | HR         | 95% CI  | n           | HR         | 95% CI  |
| <63                            | 1                                        | <b>ref</b> |          | 8                            | <b>ref</b> |         | 41          | <b>ref</b> |         | 26          | <b>ref</b> |         |
| 63- <287                       | 1                                        | <b>1.0</b> | 0.1–15.4 | 13                           | <b>1.6</b> | 0.7–3.8 | 57          | <b>1.4</b> | 0.9–2.0 | 39          | <b>1.5</b> | 0.9–2.4 |
| 287- <865                      | 2                                        | <b>1.8</b> | 0.2–19.4 | 15                           | <b>1.7</b> | 0.7–4.0 | 69          | <b>1.4</b> | 1.0–2.1 | 46          | <b>1.5</b> | 0.9–2.4 |
| 865- <2,271                    | 4                                        | <b>3.5</b> | 0.4–31.7 | 17                           | <b>1.9</b> | 0.8–4.5 | 75          | <b>1.5</b> | 1.0–2.0 | 40          | <b>1.3</b> | 0.8–2.1 |
| ≥2,271                         | 4                                        | <b>4.1</b> | 0.5–37.1 | 12                           | <b>1.6</b> | 0.7–4.0 | 55          | <b>1.1</b> | 0.7–1.7 | 29          | <b>0.9</b> | 0.5–1.6 |

\* Quintiles of cumulative exposure based on distribution among the full cohort, n=9,951.

† All models unadjusted.

Abbreviations: n, number; HR, hazard ratio; CI, confidence interval; ref, referent; NHL, non-Hodgkins lymphoma; NMRD, nonmalignant respiratory disease; COPD, chronic obstructive pulmonary disease; ppm, parts per million.

Supplemental Table S.3. Cox proportional hazards ratios for selected causes of death by cumulative exposure\* to vinyl chloride in inception subcohort with follow-up starting in 1973, n=6,701.†

| Cumulative exposure, ppm-years | Melanoma, n=17 |            |         | Brain cancer, n=31 |            |         | Lung cancer, n=397 |            |         | NHL, n=35 |            |         |
|--------------------------------|----------------|------------|---------|--------------------|------------|---------|--------------------|------------|---------|-----------|------------|---------|
|                                | n              | HR         | 95% CI  | n                  | HR         | 95% CI  | n                  | HR         | 95% CI  | n         | HR         | 95% CI  |
| <63                            | 3              | <b>ref</b> |         | 6                  | <b>ref</b> |         | 68                 | <b>ref</b> |         | 10        | <b>ref</b> |         |
| 63- <287                       | 5              | <b>1.6</b> | 0.4–6.7 | 9                  | <b>1.4</b> | 0.5–4.0 | 94                 | <b>1.3</b> | 1.0–1.8 | 4         | <b>0.4</b> | 0.1–1.2 |
| 287- <865                      | 4              | <b>1.2</b> | 0.3–5.2 | 9                  | <b>1.4</b> | 0.5–3.9 | 82                 | <b>1.1</b> | 0.8–1.5 | 7         | <b>0.6</b> | 0.2–1.6 |
| 865- <2,271                    | 2              | <b>0.6</b> | 0.1–3.4 | 3                  | <b>0.5</b> | 0.1–1.9 | 89                 | <b>1.2</b> | 0.8–1.6 | 6         | <b>0.5</b> | 0.2–1.4 |
| ≥2,271                         | 3              | <b>0.9</b> | 0.2–4.6 | 4                  | <b>0.8</b> | 0.2–2.7 | 64                 | <b>0.9</b> | 0.7–1.3 | 8         | <b>0.7</b> | 0.3–1.9 |

  

| Cumulative exposure, ppm-years | Connective and soft tissue cancers, n=10 |            |          | Cirrhosis of the liver, n=59 |            |         | NMRD, n=282 |            |         | COPD, n=171 |            |         |
|--------------------------------|------------------------------------------|------------|----------|------------------------------|------------|---------|-------------|------------|---------|-------------|------------|---------|
|                                | n                                        | HR         | 95% CI   | n                            | HR         | 95% CI  | n           | HR         | 95% CI  | n           | HR         | 95% CI  |
| <63                            | 1                                        | <b>ref</b> |          | 8                            | <b>ref</b> |         | 41          | <b>ref</b> |         | 26          | <b>ref</b> |         |
| 63- <287                       | 1                                        | <b>0.9</b> | 0.1–15.2 | 10                           | <b>1.2</b> | 0.5–3.0 | 55          | <b>1.3</b> | 0.9–1.9 | 38          | <b>1.4</b> | 0.9–2.3 |
| 287- <865                      | 1                                        | <b>0.9</b> | 0.1–14.3 | 14                           | <b>1.6</b> | 0.7–3.9 | 65          | <b>1.4</b> | 0.9–2.0 | 43          | <b>1.4</b> | 0.9–2.3 |
| 865- <2,271                    | 3                                        | <b>2.7</b> | 0.3–26.3 | 15                           | <b>1.8</b> | 0.8–4.3 | 69          | <b>1.4</b> | 0.9–2.0 | 37          | <b>1.2</b> | 0.7–1.9 |
| ≥2,271                         | 4                                        | <b>4.3</b> | 0.5–39.0 | 12                           | <b>1.8</b> | 0.7–4.6 | 52          | <b>1.0</b> | 0.7–1.6 | 27          | <b>0.9</b> | 0.5–1.5 |

\* Quintiles of cumulative exposure based on distributions among the full cohort, n=9,951.

† All models unadjusted.

Abbreviations: n, number; HR, hazard ratio; CI, confidence interval; ref, referent; NHL, non-Hodgkins lymphoma; NMRD, nonmalignant respiratory disease; COPD, chronic obstructive pulmonary disease; ppm, parts per million.

Supplemental Table S.4. Cox proportional hazards ratios for selected causes of death by duration of employment\* in the full cohort, n=9,951.†

| Duration of employment, years | Melanoma, n=29 |            |         | Brain cancer, n=52 |            |         | Lung cancer, n=591 |            |         | NHL, n=64 |            |         |
|-------------------------------|----------------|------------|---------|--------------------|------------|---------|--------------------|------------|---------|-----------|------------|---------|
|                               | n              | HR         | 95% CI  | n                  | HR         | 95% CI  | n                  | HR         | 95% CI  | n         | HR         | 95% CI  |
| <5                            | 7              | ref        | --      | 10                 | ref        | --      | 120                | ref        | --      | 10        | ref        | --      |
| 5- <12                        | 4              | <b>0.6</b> | 0.2–2.1 | 7                  | <b>0.7</b> | 0.3–1.9 | 85                 | <b>0.8</b> | 0.6–1.0 | 6         | <b>0.6</b> | 0.2–1.7 |
| 12- <18                       | 7              | <b>0.9</b> | 0.3–2.5 | 12                 | <b>1.0</b> | 0.5–2.4 | 113                | <b>0.8</b> | 0.6–1.1 | 15        | <b>1.4</b> | 0.6–3.0 |
| 18- <28                       | 7              | <b>0.7</b> | 0.2–1.9 | 13                 | <b>1.1</b> | 0.5–2.4 | 135                | <b>0.8</b> | 0.6–1.0 | 16        | <b>1.2</b> | 0.5–2.7 |
| ≥28                           | 4              | <b>0.4</b> | 0.1–1.3 | 10                 | <b>1.1</b> | 0.4–2.6 | 138                | <b>0.8</b> | 0.6–1.0 | 17        | <b>1.3</b> | 0.6–2.8 |

  

| Duration of employment, years | Connective and soft tissue cancers, n=20 |            |         | Cirrhosis of the liver, n=97 |            |         | NMRD, n=430 |            |                | COPD, n=248 |            |                |
|-------------------------------|------------------------------------------|------------|---------|------------------------------|------------|---------|-------------|------------|----------------|-------------|------------|----------------|
|                               | n                                        | HR         | 95% CI  | n                            | HR         | 95% CI  | n           | HR         | 95% CI         | n           | HR         | 95% CI         |
| <5                            | 4                                        | ref        | --      | 23                           | ref        | --      | 89          | ref        | --             | 57          | ref        | --             |
| 5- <12                        | 2                                        | <b>0.5</b> | 0.1–2.9 | 19                           | <b>0.9</b> | 0.5–1.6 | 69          | <b>0.9</b> | 0.7–1.2        | 42          | <b>0.8</b> | 0.6–1.3        |
| 12- <18                       | 2                                        | <b>0.4</b> | 0.1–2.3 | 18                           | <b>0.7</b> | 0.4–1.3 | 68          | <b>0.7</b> | <b>0.5–0.9</b> | 43          | <b>0.7</b> | 0.4–1.0        |
| 18- <28                       | 7                                        | <b>1.3</b> | 0.4–4.4 | 22                           | <b>0.8</b> | 0.4–1.4 | 105         | <b>0.7</b> | 0.6–1.0        | 57          | <b>0.6</b> | <b>0.4–0.9</b> |
| ≥28                           | 5                                        | <b>1.0</b> | 0.3–3.8 | 15                           | <b>0.6</b> | 0.3–1.2 | 99          | <b>0.6</b> | 0.5–0.8        | 49          | <b>0.4</b> | 0.3–0.7        |

\* Quintiles of duration of employment based on distributions among the full cohort, n=9,951.

† All models unadjusted.

Abbreviations: n, number; HR, hazard ratio; CI, confidence interval; ref, referent; NHL, non-Hodgkins lymphoma; NMRD, nonmalignant respiratory disease; COPD, chronic obstructive pulmonary disease; ppm, parts per million.

Supplemental Table S.5. Cox proportional hazards ratios for selected causes of death by duration of employment\* in inception subcohort, n=7,273.†

| Duration of employment, years | Melanoma, n=18 |            |          | Brain cancer, n=38 |            |         | Lung cancer, n=425 |            |         | NHL, n=40 |            |         |
|-------------------------------|----------------|------------|----------|--------------------|------------|---------|--------------------|------------|---------|-----------|------------|---------|
|                               | n              | HR         | 95% CI   | n                  | HR         | 95% CI  | n                  | HR         | 95% CI  | n         | HR         | 95% CI  |
| <5                            | 6              | ref        |          | 10                 | ref        |         | 117                | ref        |         | 10        | ref        |         |
| 5- <12                        | 4              | <b>0.9</b> | 0.2–3.0  | 5                  | <b>0.6</b> | 0.2–1.7 | 68                 | <b>0.7</b> | 0.5–1.0 | 2         | <b>0.2</b> | 0.1–1.1 |
| 12- <18                       | 4              | <b>0.7</b> | 0.2–2.6  | 8                  | <b>0.9</b> | 0.4–2.2 | 85                 | <b>0.8</b> | 0.6–1.0 | 10        | <b>1.1</b> | 0.5–2.6 |
| 18- <28                       | 3              | <b>0.5</b> | 0.1–2.2  | 9                  | <b>1.2</b> | 0.5–3.0 | 77                 | <b>0.8</b> | 0.6–1.0 | 7         | <b>0.8</b> | 0.3–2.2 |
| ≥28                           | 1              | <b>0.2</b> | 0.02–1.5 | 6                  | <b>1.0</b> | 0.4–2.9 | 78                 | <b>0.8</b> | 0.6–1.1 | 11        | <b>1.3</b> | 0.5–3.0 |

  

| Duration of employment, years | Connective and soft tissue cancers, n=12 |            |          | Cirrhosis of the liver, n=65 |            |         | NMRD, n=297 |            |                | COPD, n=180 |            |                |
|-------------------------------|------------------------------------------|------------|----------|------------------------------|------------|---------|-------------|------------|----------------|-------------|------------|----------------|
|                               | n                                        | HR         | 95% CI   | n                            | HR         | 95% CI  | n           | HR         | 95% CI         | n           | HR         | 95% CI         |
| <5                            | 4                                        | ref        |          | 22                           | ref        |         | 79          | ref        |                | 53          | ref        |                |
| 5- <12                        | 1                                        | <b>0.3</b> | 0.03–2.7 | 15                           | <b>0.8</b> | 0.4–1.6 | 56          | <b>0.9</b> | 0.7–1.3        | 36          | <b>0.9</b> | 0.6–1.3        |
| 12- <18                       | 2                                        | <b>0.5</b> | 0.1–2.9  | 10                           | <b>0.5</b> | 0.2–1.1 | 47          | <b>0.7</b> | 0.5–1.0        | 31          | <b>0.7</b> | 0.4–1.0        |
| 18- <28                       | 2                                        | <b>0.6</b> | 0.1–3.3  | 12                           | <b>0.7</b> | 0.3–1.4 | 59          | <b>0.8</b> | 0.6–1.1        | 34          | <b>0.7</b> | 0.4–1.0        |
| ≥28                           | 3                                        | <b>1.1</b> | 0.2–5.0  | 6                            | <b>0.4</b> | 0.2–1.0 | 56          | <b>0.7</b> | <b>0.5–0.9</b> | 26          | <b>0.4</b> | <b>0.3–0.7</b> |

\* Quintiles of duration of employment based on distributions among the full cohort, n=9,951.

† All models unadjusted.

Abbreviations: n, number; HR, hazard ratio; CI, confidence interval; ref, referent; NHL, non-Hodgkins lymphoma; NMRD, nonmalignant respiratory disease; COPD, chronic obstructive pulmonary disease; ppm, parts per million.

Supplemental Table S.6. Cox proportional hazards ratios for selected causes of death by duration of employment\* in inception subcohort with follow-up starting in 1973, n=6,701.†

| Duration of employment, years | Melanoma, n=17 |            |          | Brain cancer, n=31 |            |         | Lung cancer, n=397 |            |         | NHL, n=35 |            |         |
|-------------------------------|----------------|------------|----------|--------------------|------------|---------|--------------------|------------|---------|-----------|------------|---------|
|                               | n              | HR         | 95% CI   | n                  | HR         | 95% CI  | n                  | HR         | 95% CI  | n         | HR         | 95% CI  |
| <5                            | 6              | ref        |          | 7                  | ref        |         | 110                | ref        |         | 9         | ref        |         |
| 5- <12                        | 3              | <b>0.6</b> | 0.2–2.6  | 5                  | <b>0.8</b> | 0.3–2.7 | 63                 | <b>0.7</b> | 0.5–1.0 | 2         | <b>0.3</b> | 0.1–1.3 |
| 12- <18                       | 4              | <b>0.7</b> | 0.2–2.6  | 7                  | <b>1.1</b> | 0.4–3.1 | 76                 | <b>0.7</b> | 0.6–1.0 | 7         | <b>0.8</b> | 0.3–2.3 |
| 18- <28                       | 3              | <b>0.5</b> | 0.1–2.2  | 6                  | <b>1.2</b> | 0.4–3.5 | 70                 | <b>0.7</b> | 0.5–1.0 | 6         | <b>0.7</b> | 0.3–2.1 |
| ≥28                           | 1              | <b>0.2</b> | 0.02–1.3 | 6                  | <b>1.2</b> | 0.4–3.7 | 78                 | <b>0.8</b> | 0.6–1.0 | 11        | <b>1.2</b> | 0.5–3.0 |

  

| Duration of employment, years | Connective and soft tissue cancers, n=10 |            |          | Cirrhosis of the liver, n=59 |            |         | NMRD, n=282 |            |                | COPD, n=171 |            |                |
|-------------------------------|------------------------------------------|------------|----------|------------------------------|------------|---------|-------------|------------|----------------|-------------|------------|----------------|
|                               | n                                        | HR         | 95% CI   | n                            | HR         | 95% CI  | n           | HR         | 95% CI         | n           | HR         | 95% CI         |
| <5                            | 3                                        | ref        |          | 20                           | ref        |         | 74          | ref        |                | 51          | ref        |                |
| 5- <12                        | 1                                        | <b>0.4</b> | 0.04–3.9 | 13                           | <b>0.8</b> | 0.4–1.5 | 51          | <b>0.9</b> | 0.6–1.3        | 33          | <b>0.8</b> | 0.5–1.3        |
| 12- <18                       | 2                                        | <b>0.7</b> | 0.1–4.2  | 8                            | <b>0.4</b> | 0.2–1.0 | 44          | <b>0.7</b> | 0.5–1.0        | 28          | <b>0.6</b> | 0.4–1.0        |
| 18- <28                       | 1                                        | <b>0.4</b> | 0.04–4.0 | 12                           | <b>0.8</b> | 0.4–1.7 | 57          | <b>0.8</b> | 0.6–1.1        | 33          | <b>0.7</b> | 0.4–1.0        |
| ≥28                           | 3                                        | <b>1.2</b> | 0.2–6.2  | 6                            | <b>0.4</b> | 0.2–1.1 | 56          | <b>0.7</b> | <b>0.5–0.9</b> | 26          | <b>0.4</b> | <b>0.3–0.7</b> |

\* Quintiles of duration of employment based on distributions among the full cohort, n=9,951.

† All models unadjusted.

Abbreviations: n, number; HR, hazard ratio; CI, confidence interval; ref, referent; NHL, non-Hodgkins lymphoma; NMRD, nonmalignant respiratory disease; COPD, chronic obstructive pulmonary disease; ppm, parts per million.

Supplemental Table S.7. Observed and expected deaths, standardized mortality ratios, and 95% confidence intervals using state referent rates\* for liver cancer†

| Year of birth                | Full cohort (n=9,951) |     |             |                  | Inception subcohort (n=7,273) |     |             |                  | Inception subcohort, follow-up beginning in 1973 (n=6,701) |     |             |                  |
|------------------------------|-----------------------|-----|-------------|------------------|-------------------------------|-----|-------------|------------------|------------------------------------------------------------|-----|-------------|------------------|
|                              | O                     | E   | SMR         | 95% CI           | O                             | E   | SMR         | 95% CI           | O                                                          | E   | SMR         | 95% CI           |
| ≤ 1917                       | 28                    | 6.5 | <b>4.33</b> | <b>2.87–6.25</b> | 9                             | 3.6 | <b>2.48</b> | <b>1.13–4.71</b> | 8                                                          | 2.6 | <b>3.06</b> | <b>1.32–6.02</b> |
| 1918-1925                    | 32                    | 7.7 | <b>4.18</b> | <b>2.86–5.90</b> | 18                            | 4.9 | <b>3.70</b> | <b>2.19–5.85</b> | 16                                                         | 4.7 | <b>3.40</b> | <b>1.94–5.52</b> |
| 1926-1932                    | 27                    | 7.1 | <b>3.78</b> | <b>2.49–5.50</b> | 21                            | 5.1 | <b>4.11</b> | <b>2.54–6.28</b> | 20                                                         | 5.1 | <b>3.93</b> | <b>2.40–6.07</b> |
| 1933-1941                    | 25                    | 7.0 | <b>3.59</b> | <b>2.32–5.29</b> | 17                            | 5.3 | <b>3.20</b> | <b>1.86–5.12</b> | 16                                                         | 5.3 | <b>3.01</b> | <b>1.72–4.89</b> |
| ≥ 1942                       | 5                     | 3.5 | <b>1.41</b> | 0.46–3.29        | 5                             | 3.4 | <b>1.49</b> | 0.48–3.47        | 5                                                          | 3.4 | <b>1.49</b> | 0.48–3.47        |
| Year of hire                 |                       |     |             |                  |                               |     |             |                  |                                                            |     |             |                  |
| ≤ 1946                       | 33                    | 6.3 | <b>5.23</b> | <b>3.60–7.35</b> | 13                            | 3.1 | <b>4.25</b> | <b>2.26–7.27</b> | 11                                                         | 2.4 | <b>4.51</b> | <b>2.25–8.07</b> |
| 1947 – 1952                  | 29                    | 7.7 | <b>3.75</b> | <b>2.51–5.39</b> | 20                            | 5.7 | <b>3.50</b> | <b>2.14–5.41</b> | 18                                                         | 5.3 | <b>3.40</b> | <b>2.01–5.38</b> |
| 1953 – 1960                  | 33                    | 6.7 | <b>4.95</b> | <b>3.40–6.95</b> | 18                            | 3.8 | <b>4.73</b> | <b>2.80–7.47</b> | 17                                                         | 3.7 | <b>4.58</b> | <b>2.67–7.34</b> |
| 1961 – 1966                  | 13                    | 6.4 | <b>2.02</b> | <b>1.08–3.46</b> | 11                            | 5.3 | <b>2.08</b> | <b>1.04–3.72</b> | 11                                                         | 5.3 | <b>2.09</b> | <b>1.04–3.74</b> |
| ≥1967                        | 9                     | 4.7 | <b>1.93</b> | 0.88–3.67        | 8                             | 4.4 | <b>1.82</b> | 0.78–3.59        | 8                                                          | 4.4 | <b>1.82</b> | 0.79–3.59        |
| Age at hire (yrs)            |                       |     |             |                  |                               |     |             |                  |                                                            |     |             |                  |
| ≤ 22                         | 27                    | 5.7 | <b>4.77</b> | <b>3.14–6.93</b> | 16                            | 3.6 | <b>4.39</b> | <b>2.51–7.14</b> | 16                                                         | 3.6 | <b>4.41</b> | <b>2.52–7.16</b> |
| 22 - < 24                    | 28                    | 5.0 | <b>5.65</b> | <b>3.75–8.16</b> | 18                            | 3.6 | <b>5.06</b> | <b>3.00–8.01</b> | 15                                                         | 3.5 | <b>4.24</b> | <b>2.37–6.99</b> |
| 24 - < 28                    | 21                    | 8.1 | <b>2.61</b> | <b>1.61–3.99</b> | 11                            | 5.7 | <b>1.94</b> | 0.97–3.47        | 10                                                         | 5.6 | <b>1.79</b> | 0.86–3.29        |
| 28 - < 33                    | 20                    | 6.0 | <b>3.32</b> | <b>2.03–5.12</b> | 15                            | 4.3 | <b>3.48</b> | <b>1.95–5.74</b> | 14                                                         | 4.1 | <b>3.39</b> | <b>1.85–5.69</b> |
| ≥ 33                         | 21                    | 7.1 | <b>2.97</b> | <b>1.84–4.54</b> | 10                            | 5.1 | <b>1.97</b> | 0.94–3.62        | 10                                                         | 4.2 | <b>2.38</b> | <b>1.14–4.38</b> |
| Duration of employment (yrs) |                       |     |             |                  |                               |     |             |                  |                                                            |     |             |                  |
| < 5                          | 5                     | 5.6 | <b>0.89</b> | 0.29–2.07        | 5                             | 5.3 | <b>0.95</b> | 0.31–2.21        | 4                                                          | 5.0 | <b>0.81</b> | 0.22–2.07        |
| 5 - < 12                     | 14                    | 5.1 | <b>2.76</b> | <b>1.51–4.64</b> | 9                             | 4.3 | <b>2.12</b> | 0.96–4.02        | 9                                                          | 4.0 | <b>2.25</b> | <b>1.03–4.28</b> |
| 12 - < 18                    | 21                    | 6.4 | <b>3.26</b> | <b>2.02–4.98</b> | 16                            | 4.8 | <b>3.30</b> | <b>1.89–5.37</b> | 14                                                         | 4.6 | <b>3.04</b> | <b>1.66–5.11</b> |
| 18 - < 28                    | 41                    | 7.4 | <b>5.56</b> | <b>3.99–7.55</b> | 19                            | 4.0 | <b>4.71</b> | <b>2.83–7.36</b> | 17                                                         | 3.7 | <b>4.57</b> | <b>2.66–7.32</b> |
| ≥ 28                         | 36                    | 7.3 | <b>4.96</b> | <b>3.47–6.86</b> | 21                            | 3.9 | <b>5.45</b> | <b>3.37–8.33</b> | 21                                                         | 3.8 | <b>5.48</b> | <b>3.39–8.38</b> |



| Year of birth         | Full cohort (n=9,951) |      |             |                  | Inception subcohort (n=7,273) |      |             |                  | Inception subcohort, follow-up beginning in 1973 (n=6,701) |      |             |                  |
|-----------------------|-----------------------|------|-------------|------------------|-------------------------------|------|-------------|------------------|------------------------------------------------------------|------|-------------|------------------|
|                       | O                     | E    | SMR         | 95% CI           | O                             | E    | SMR         | 95% CI           | O                                                          | E    | SMR         | 95% CI           |
| Time since hire (yrs) |                       |      |             |                  |                               |      |             |                  |                                                            |      |             |                  |
| < 33                  | 28                    | 7.6  | <b>3.67</b> | <b>2.44–5.31</b> | 22                            | 5.7  | <b>3.83</b> | <b>2.40–5.80</b> | 17                                                         | 4.6  | <b>3.72</b> | <b>2.17–5.96</b> |
| 33 - < 43             | 36                    | 10.7 | <b>3.36</b> | <b>2.35–4.65</b> | 16                            | 7.9  | <b>2.02</b> | <b>1.15–3.28</b> | 16                                                         | 7.9  | <b>2.02</b> | <b>1.15–3.28</b> |
| 43 - < 48             | 16                    | 5.7  | <b>2.80</b> | <b>1.60–4.54</b> | 12                            | 4.0  | <b>3.00</b> | <b>1.55–5.24</b> | 12                                                         | 4.0  | <b>3.00</b> | <b>1.55–5.24</b> |
| 48 - < 54             | 23                    | 4.6  | <b>4.97</b> | <b>3.15–7.46</b> | 13                            | 2.9  | <b>4.56</b> | <b>2.43–7.80</b> | 13                                                         | 2.9  | <b>4.56</b> | <b>2.43–7.80</b> |
| ≥ 54                  | 14                    | 3.1  | <b>4.52</b> | <b>2.47–7.59</b> | 7                             | 1.7  | <b>4.01</b> | <b>1.61–8.25</b> | 7                                                          | 1.7  | <b>4.01</b> | <b>1.61–8.25</b> |
| Region‡               |                       |      |             |                  |                               |      |             |                  |                                                            |      |             |                  |
| Midwest               | 15                    | 5.3  | <b>2.83</b> | <b>1.58–4.67</b> | 14                            | 3.7  | <b>3.81</b> | <b>2.08–6.40</b> | 14                                                         | 3.6  | <b>3.94</b> | <b>2.15–6.62</b> |
| Northeast             | 30                    | 4.6  | <b>6.53</b> | <b>4.41–9.33</b> | 8                             | 2.6  | <b>3.02</b> | <b>1.30–5.96</b> | 8                                                          | 2.6  | <b>3.10</b> | <b>1.33–6.10</b> |
| South                 | 72                    | 21.9 | <b>3.29</b> | <b>2.57–4.14</b> | 48                            | 16.0 | <b>3.01</b> | <b>2.22–3.99</b> | 43                                                         | 15.0 | <b>2.88</b> | <b>2.08–3.87</b> |
| Plant product         |                       |      |             |                  |                               |      |             |                  |                                                            |      |             |                  |
| PVC                   | 112                   | 27.5 | <b>4.07</b> | <b>3.35–4.89</b> | 69                            | 20.3 | <b>3.41</b> | <b>2.65–4.31</b> | 64                                                         | 19.1 | <b>3.35</b> | <b>2.58–4.28</b> |
| VCM only              | 5                     | 4.2  | <b>1.18</b> | 0.38–2.76        | 1                             | 2.0  | <b>0.50</b> | 0.01–2.78        | 1                                                          | 2.0  | <b>0.50</b> | 0.01–2.80        |

\*State referent rates: 401,524 person-years for a full cohort of 9,951 workers.

† Liver cancers were ICD-9 155.0, 155.2, ICD-10 C22.0, C22.2-C22.4, C22.7, C22.9.

‡Defined using US census regions. South includes the state of California.

Abbreviations: O, observed; E, expected; SMR, standardized mortality ratio; CI, confidence interval; yrs, years; PVC, polyvinyl chloride; VCM, vinyl chloride monomer.

Supplemental Table S.8. Cox proportional hazards ratios for angiosarcoma of the liver (ASL) and hepatocellular carcinoma (HCC) by lagged cumulative exposure (low cut-points)\*

| Cumulative exposure, ppm-years | ASL, n=63 |             |                  | HCC, n=32 |             |                 |
|--------------------------------|-----------|-------------|------------------|-----------|-------------|-----------------|
|                                | n         | HR          | 95% CI           | n         | HR          | 95% CI          |
| <b>10-year lag</b>             |           |             |                  |           |             |                 |
| <63                            |           |             |                  | 3         | <b>Ref</b>  |                 |
| 63- <287                       |           |             |                  | 3         | <b>1.1</b>  | 0.2–5.3         |
| 287- <865                      | 5†        | <b>Ref</b>  |                  | 1         | <b>0.3</b>  | 0.03–3.1        |
| 865- <2,271                    | 10        | <b>6.5</b>  | <b>2.2–19.2</b>  | 4         | <b>1.2</b>  | 0.3–5.3         |
| ≥2,271                         | 48        | <b>34.2</b> | <b>13.5–86.3</b> | 21        | <b>5.6</b>  | <b>1.7–18.8</b> |
| <b>20-year lag</b>             |           |             |                  |           |             |                 |
| <63                            | 6         | <b>Ref</b>  |                  | 3         | <b>Ref</b>  |                 |
| 63- <287                       | 2         | <b>1.2</b>  | 0.2–6.4          | 3         | <b>1.3</b>  | 0.3–6.4         |
| 287- <865                      | 5         | <b>3.0</b>  | 0.8–10.9         | 1         | <b>0.4</b>  | 0.04–3.8        |
| 865- <2,271                    | 9         | <b>5.8</b>  | <b>1.8–18.9</b>  | 4         | <b>1.5</b>  | 0.3–6.6         |
| ≥2,271                         | 41        | <b>33.8</b> | <b>11.9–96.1</b> | 21        | <b>7.1</b>  | <b>2.1–24.4</b> |
| <b>30-year lag</b>             |           |             |                  |           |             |                 |
| <63                            | 25        | <b>Ref</b>  |                  | 3         | <b>Ref</b>  |                 |
| 63- <287                       | 0         | --          | --               | 3         | <b>2.4</b>  | 0.5–12.6        |
| 287- <865                      | 6         | <b>1.7</b>  | 0.6–4.6          | 1         | <b>0.8</b>  | 0.1–7.6         |
| 865- <2,271                    | 8         | <b>2.6</b>  | 1.0–6.6          | 7         | <b>5.2</b>  | <b>1.2–21.8</b> |
| ≥2,271                         | 24        | <b>11.1</b> | <b>5.1–24.0</b>  | 18        | <b>14.2</b> | <b>3.7–54.5</b> |
| <b>40-year lag</b>             |           |             |                  |           |             |                 |
| <63                            | 41        | <b>Ref</b>  |                  | 9         | <b>Ref</b>  |                 |
| 63- <287                       | 4         | <b>2.2</b>  | 0.7–6.9          | 3         | <b>2.1</b>  | 0.5–8.5         |
| 287- <865                      | 2         | <b>1.2</b>  | 0.3–5.3          | 4         | <b>2.5</b>  | 0.7–9.3         |
| 865- <2,271                    | 8         | <b>5.7</b>  | <b>2.2–15.1</b>  | 4         | <b>2.6</b>  | 0.7–9.9         |
| ≥2,271                         | 8         | <b>9.2</b>  | <b>3.3–25.9</b>  | 12        | <b>9.4</b>  | <b>3.1–28.2</b> |

\*Low cut-points based on quintiles of unlagged cumulative exposure for the entire cohort.

†Due to zero cases in the referent group and few cases in the first two quintiles of the 10-year lag model, the first three quintiles have been collapsed to form a single referent category.

Abbreviations: n, number; HR, hazard ratio; CI, confidence interval; Ref, referent

Supplemental Table S.9. Cox proportional hazards ratios for angiosarcoma of the liver (ASL) and hepatocellular carcinoma (HCC), by lagged cumulative exposure (high cut-points)\*

| Cumulative exposure, ppm-years | ASL, n=63 |      |            | HCC, n=32 |      |            |
|--------------------------------|-----------|------|------------|-----------|------|------------|
|                                | n         | HR   | 95% CI     | n         | HR   | 95% CI     |
| 10-year lag                    |           |      |            |           |      |            |
| <1,021                         | 7         | Ref  |            | 8         | Ref  |            |
| 1,021- <3,301                  | 12        | 5.4  | 2.1–13.7   | 4         | 1.2  | 0.4–3.9    |
| 3,301- <5,686                  | 11        | 18.8 | 7.2–48.6   | 7         | 7.4  | 2.7–20.5   |
| 5,686- <10,551                 | 21        | 47.4 | 19.9–112.7 | 6         | 7.5  | 2.6–21.7   |
| ≥10,551                        | 12        | 69.2 | 26.8–179.1 | 7         | 19.7 | 7.1–54.7   |
| 20-year lag                    |           |      |            |           |      |            |
| <1,021                         | 15        | Ref  |            | 8         | Ref  |            |
| 1,021- <3,301                  | 12        | 4.3  | 1.9–9.7    | 4         | 1.3  | 0.4–4.3    |
| 3,301- <5,686                  | 11        | 16.3 | 7.1–37.6   | 8         | 9.5  | 3.5–25.4   |
| 5,686- <10,551                 | 16        | 35.4 | 16.1–78.1  | 5         | 7.2  | 2.3–22.3   |
| ≥10,551                        | 9         | 66.9 | 26.4–169.5 | 7         | 24.5 | 8.7–69.2   |
| 30-year lag                    |           |      |            |           |      |            |
| <1,021                         | 33        | Ref  |            | 8         | Ref  |            |
| 1,021- <3,301                  | 9         | 2.8  | 1.2–6.2    | 8         | 3.8  | 1.4–10.4   |
| 3,301- <5,686                  | 10        | 13.2 | 5.9–29.5   | 5         | 8.9  | 2.8–28.5   |
| 5,686- <10,551                 | 6         | 14.0 | 5.2–37.1   | 6         | 14.6 | 4.7–45.1   |
| ≥10,551                        | 5         | 55.8 | 18.4–168.9 | 5         | 34.6 | 10.3–115.8 |
| 40-year lag                    |           |      |            |           |      |            |
| <1,021                         | 47        | Ref  |            | 17        | Ref  |            |
| 1,021- <3,301                  | 8         | 4.9  | 2.0–12.1   | 3         | 1.1  | 0.3–4.0    |
| 3,301- <5,686                  | 3         | 8.7  | 2.4–32.3   | 3         | 4.3  | 1.2–15.6   |
| 5,686- <10,551                 | 4         | 24.6 | 7.2–84.0   | 7         | 15.5 | 5.8–41.7   |
| ≥10,551                        | 1         | 54.4 | 5.9–499.4  | 2         | 22.4 | 4.6–108.9  |

\*High cut-points based on quintiles of unlagged cumulative exposure for liver cancers in the entire cohort.

†Due to zero cases in the referent group and few cases in the first two quintiles of the 10-year lag model, the first three quintiles have been collapsed to form a single referent category.

Abbreviations: n, number; HR, hazard ratio; CI, confidence interval; Ref, referent

Supplemental Table S.10. Cox proportional hazard ratios for angiosarcoma of the liver (ASL), hepatocellular carcinoma, (HCC), and unspecified liver cancer by duration of employment in the full cohort, n=9,951.\*

| Duration of employment, years | ASL, n=63 |             |                 | HCC, n=32 |            |                 | Unspecified liver cancer, n=36 |            |          |
|-------------------------------|-----------|-------------|-----------------|-----------|------------|-----------------|--------------------------------|------------|----------|
|                               | n         | HR          | 95% CI          | n         | HR         | 95% CI          | n                              | HR         | 95% CI   |
| Low cut-points†               |           |             |                 |           |            |                 |                                |            |          |
| <5                            | 2         | <b>ref</b>  |                 |           |            |                 | 4                              | <b>ref</b> |          |
| 5- <12                        | 4         | <b>2.1</b>  | 0.4–11.3        | 4‡        | <b>ref</b> |                 | 6                              | <b>1.7</b> | 0.5–6.0  |
| 12- <18                       | 12        | <b>5.1</b>  | <b>1.2–23.0</b> | 4         | <b>1.7</b> | 0.4–6.6         | 8                              | <b>1.7</b> | 0.5–5.8  |
| 18- <28                       | 24        | <b>9.9</b>  | <b>2.3–41.8</b> | 10        | <b>2.9</b> | 0.9–9.2         | 12                             | <b>1.9</b> | 0.6–5.9  |
| ≥28                           | 21        | <b>11.9</b> | <b>2.8–51.6</b> | 14        | <b>3.6</b> | <b>1.2–11.1</b> | 6                              | <b>0.9</b> | 0.2–3.0  |
| High cut-points§              |           |             |                 |           |            |                 |                                |            |          |
| <14                           | 9         | <b>ref</b>  |                 | 4         | <b>ref</b> |                 | 13                             | <b>ref</b> |          |
| 14- <21                       | 15        | <b>3.5</b>  | <b>1.5–8.0</b>  | 6         | <b>2.9</b> | 0.8–10.2        | 9                              | <b>1.3</b> | 0.6–3.1  |
| 21- <26                       | 16        | <b>6.6</b>  | <b>2.9–15.0</b> | 5         | <b>3.1</b> | 0.8–11.7        | 6                              | <b>1.2</b> | 0.5–3.2  |
| 26- <31                       | 6         | <b>2.5</b>  | 0.9–7.2         | 9         | <b>4.4</b> | <b>1.4–14.5</b> | 7                              | <b>1.1</b> | 0.4–2.8  |
| ≥31                           | 17        | <b>9.2</b>  | <b>4.0–21.4</b> | 8         | <b>4.2</b> | <b>1.2–14.0</b> | 1                              | <b>0.2</b> | 0.02–1.3 |

\*All models unadjusted.

†Low cut-points based on quintiles of duration of employment for the entire cohort.

‡ Due to zero cases in the referent group, the first two quintiles have been collapsed to form a single referent category.

§ High cut-points are based on quintiles of duration of employment for all liver cancers in the entire cohort.

Abbreviations: n, number; HR, hazard ratio; CI, confidence interval; ref, referent.

Supplemental Table S.11. Cox proportional hazard ratios for angiosarcoma of the liver (ASL), hepatocellular carcinoma, (HCC), and unspecified liver cancer, by cumulative exposure in inception subcohort, n=7,273.\*

| Cumulative exposure,<br>ppm-years | ASL, n=43 |             |                   | HCC, n=18 |             |                  | Unspecified liver cancer,<br>n=19 |            |          |
|-----------------------------------|-----------|-------------|-------------------|-----------|-------------|------------------|-----------------------------------|------------|----------|
|                                   | n         | HR          | 95% CI            | n         | HR          | 95% CI           | n                                 | HR         | 95% CI   |
| Low cut-points†                   |           |             |                   |           |             |                  |                                   |            |          |
| <63                               |           |             |                   | 1         | <b>ref</b>  |                  | 1                                 | <b>ref</b> |          |
| 63- <287                          |           |             |                   | 2         | <b>1.9</b>  | 0.2–21.4         | 2                                 | <b>1.9</b> | 0.2–21.3 |
| 287- <865                         | 4‡        | <b>ref</b>  |                   | 1         | <b>0.9</b>  | 0.1–13.5         | 4                                 | <b>3.4</b> | 0.4–30.8 |
| 865- <2,271                       | 8         | <b>5.8</b>  | <b>1.8–19.3</b>   | 4         | <b>3.2</b>  | 0.4–29.1         | 5                                 | <b>4.2</b> | 0.5–36.0 |
| ≥2,271                            | 31        | <b>28.1</b> | <b>9.9–79.7</b>   | 10        | <b>8.1</b>  | 1.0–63.5         | 7                                 | <b>6.2</b> | 0.8–50.9 |
| High cut-points§                  |           |             |                   |           |             |                  |                                   |            |          |
| <1,021                            | 6         | <b>ref</b>  |                   | 5         | <b>ref</b>  |                  | 8                                 | <b>ref</b> |          |
| 1,021- <3,301                     | 10        | <b>4.6</b>  | <b>1.7–12.7</b>   | 3         | <b>1.4</b>  | 0.3–5.8          | 6                                 | <b>1.8</b> | 0.6–5.2  |
| 3,301- <5,686                     | 9         | <b>19.0</b> | <b>6.8–53.4</b>   | 2         | <b>3.7</b>  | 0.7–19.2         | 2                                 | <b>2.5</b> | 0.5–12.0 |
| 5,686- <10,551                    | 12        | <b>35.1</b> | <b>13.2–93.6</b>  | 3         | <b>8.1</b>  | <b>1.9–33.8</b>  | 2                                 | <b>3.6</b> | 0.8–17.2 |
| ≥10,551                           | 6         | <b>40.8</b> | <b>13.1–127.0</b> | 5         | <b>28.8</b> | <b>8.3–100.2</b> | 1                                 | <b>3.9</b> | 0.5–31.6 |

\*All models unadjusted.

†Low cut-points based on quintiles of cumulative exposure for the entire cohort.

‡Due to zero cases in the referent group and few cases in the second and third quintiles, the first three quintiles have been collapsed to form a single referent category.

§High cut-points based on quintiles of cumulative exposure for all liver cancers in the entire cohort.

Abbreviations: n, number; HR, hazard ratio; CI, confidence interval; ref, referent; ppm, parts per million.

Supplemental Table S.12. Cox proportional hazard ratios for angiosarcoma of the liver (ASL), hepatocellular carcinoma, (HCC), and unspecified liver cancer, by cumulative exposure in inception subcohort with follow-up starting in 1973, n=6,701.\*

| Cumulative exposure,<br>ppm-years | ASL, n=38 |             |                   | HCC, n=18 |             |                  | Unspecified liver cancer,<br>n=19 |            |          |
|-----------------------------------|-----------|-------------|-------------------|-----------|-------------|------------------|-----------------------------------|------------|----------|
|                                   | n         | HR          | 95% CI            | n         | HR          | 95% CI           | n                                 | HR         | 95% CI   |
| Low cut-points†                   |           |             |                   |           |             |                  |                                   |            |          |
| <63                               |           |             |                   | 1         | ref         |                  | 1                                 | ref        |          |
| 63- <287                          |           |             |                   | 2         | <b>1.9</b>  | 0.2–21.2         | 2                                 | <b>1.9</b> | 0.2–21.1 |
| 287- <865                         | 4‡        | ref         |                   | 1         | <b>0.9</b>  | 0.1–13.8         | 4                                 | <b>3.5</b> | 0.4–31.4 |
| 865- <2,271                       | 7         | <b>5.5</b>  | <b>1.6–18.8</b>   | 4         | <b>3.3</b>  | 0.4–29.6         | 5                                 | <b>4.3</b> | 0.5–36.6 |
| ≥2,271                            | 27        | <b>28.6</b> | <b>9.9–82.2</b>   | 10        | <b>8.3</b>  | <b>1.1–65.3</b>  | 7                                 | <b>6.4</b> | 0.8–52.4 |
| High cut-points§                  |           |             |                   |           |             |                  |                                   |            |          |
| <1,021                            | 6         | ref         |                   | 5         | ref         |                  | 8                                 | ref        |          |
| 1,021- <3,301                     | 9         | <b>4.6</b>  | <b>1.6–13.0</b>   | 3         | <b>1.4</b>  | 0.3–5.9          | 6                                 | <b>1.9</b> | 0.6– 5.4 |
| 3,301- <5,686                     | 7         | <b>16.3</b> | <b>5.4–48.8</b>   | 2         | <b>3.7</b>  | 0.7–19.4         | 2                                 | <b>2.5</b> | 0.5–12.0 |
| 5,686- <10,551                    | 11        | <b>38.9</b> | <b>14.2–106.2</b> | 3         | <b>8.2</b>  | <b>2.0–34.7</b>  | 2                                 | <b>3.7</b> | 0.8–17.4 |
| ≥10,551                           | 5         | <b>46.7</b> | <b>14.0–155.9</b> | 5         | <b>30.4</b> | <b>8.7–106.3</b> | 1                                 | <b>4.1</b> | 0.5–33.2 |

\*All models unadjusted.

†Low cut-points based on quintiles of cumulative exposure for the entire cohort.

‡Due to zero cases in the referent group and few cases in the second and third quintiles, the first three quintiles have been collapsed to form a single referent category.

§High cut-points based on quintiles of cumulative exposure for all liver cancers in the entire cohort.

Abbreviations: n, number; HR, hazard ratio; CI, confidence interval; ref, referent; ppm, parts per million.

Supplemental Table S.13. Cox proportional hazard ratios for angiosarcoma of the liver (ASL), hepatocellular carcinoma (HCC), and unspecified liver cancer, by duration of employment in inception subcohort, n=7,273.\*

| Duration of employment, years | ASL, n=43 |             |                 | HCC, n=18 |             |                  | Unspecified liver cancer, n=19 |            |         |
|-------------------------------|-----------|-------------|-----------------|-----------|-------------|------------------|--------------------------------|------------|---------|
|                               | n         | HR          | 95% CI          | n         | HR          | 95% CI           | n                              | HR         | 95% CI  |
| Low cut-points†               |           |             |                 |           |             |                  |                                |            |         |
| <5                            | 2         | <b>ref</b>  |                 |           |             |                  | 4                              | <b>ref</b> |         |
| 5- <12                        | 4         | <b>2.3</b>  | 0.4–12.5        |           |             |                  | 4                              | <b>1.3</b> | 0.3–5.1 |
| 12- <18                       | 11        | <b>6.0</b>  | <b>1.3–26.9</b> | 4‡        | <b>ref</b>  |                  | 4                              | <b>1.1</b> | 0.3–4.5 |
| 18- <28                       | 15        | <b>10.3</b> | <b>2.4–45.2</b> | 4         | <b>2.7</b>  | 0.7–10.9         | 3                              | <b>0.8</b> | 0.2–3.6 |
| ≥28                           | 11        | <b>11.8</b> | <b>2.6–54.7</b> | 10        | <b>6.3</b>  | <b>1.9–20.7</b>  | 4                              | <b>1.0</b> | 0.2–4.0 |
| High cut-points§              |           |             |                 |           |             |                  |                                |            |         |
| <14                           | 9         | <b>ref</b>  |                 | 1         | <b>ref</b>  |                  | 9                              | <b>ref</b> |         |
| 14- <21                       | 13        | <b>3.9</b>  | <b>1.6–9.0</b>  | 3         | <b>7.3</b>  | 0.8–70.4         | 5                              | <b>1.4</b> | 0.5–4.1 |
| 21- <26                       | 9         | <b>6.1</b>  | <b>2.4–15.5</b> | 1         | <b>4.2</b>  | 0.3–67.7         | 1                              | <b>0.5</b> | 0.1–4.0 |
| 26- <31                       | 5         | <b>3.2</b>  | 1.0–9.8         | 8         | <b>22.6</b> | <b>2.8–182.1</b> | 4                              | <b>1.3</b> | 0.4–4.3 |
| ≥31                           | 7         | <b>7.5</b>  | <b>2.7–21.3</b> | 5         | <b>19.2</b> | <b>2.2–167.0</b> | 0                              | --         | --      |

\*All models unadjusted.

†Low cut-points based on quintiles of duration of employment for the entire cohort.

‡ Due to zero cases in the referent group and few cases in the second and third quintiles, the first three quintiles have been collapsed to form a single referent category.

§ High cut-points based on quintiles of duration of employment for all liver cancers in the entire cohort

Abbreviations: n, number; HR, hazard ratio; CI, confidence interval; ref, referent.

Supplemental Table S.14. Cox proportional hazard ratios for angiosarcoma of the liver (ASL), hepatocellular carcinoma (HCC), and unspecified liver cancer, by duration of employment in inception subcohort with follow up starting in 1973, n=6,701.\*

| Duration of employment, years | ASL, n=38 |             |                  | HCC, n=18 |             |                  | Unspecified liver cancer, n=19 |            |         |
|-------------------------------|-----------|-------------|------------------|-----------|-------------|------------------|--------------------------------|------------|---------|
|                               | n         | HR          | 95% CI           | n         | HR          | 95% CI           | n                              | HR         | 95% CI  |
| Low cut-points†               |           |             |                  |           |             |                  |                                |            |         |
| <5                            | 1         | <b>ref</b>  |                  |           |             |                  | 4                              | <b>ref</b> |         |
| 5- <12                        | 4         | <b>4.7</b>  | 0.5–42.0         |           |             |                  | 4                              | <b>1.3</b> | 0.3–5.1 |
| 12- <18                       | 9         | <b>9.4</b>  | <b>1.2–74.1</b>  | 4‡        | <b>ref</b>  |                  | 4                              | <b>1.1</b> | 0.3–4.4 |
| 18- <28                       | 13        | <b>18.0</b> | <b>2.3–137.7</b> | 4         | <b>2.7</b>  | 0.7–11.1         | 3                              | <b>0.8</b> | 0.2–3.7 |
| ≥28                           | 11        | <b>18.7</b> | <b>2.4–146.6</b> | 10        | <b>6.1</b>  | <b>1.9–20.1</b>  | 4                              | <b>1.0</b> | 0.2–3.9 |
| High cut-points§              |           |             |                  |           |             |                  |                                |            |         |
| <14                           | 8         | <b>ref</b>  |                  | 1         | <b>ref</b>  |                  | 9                              | <b>ref</b> |         |
| 14- <21                       | 10        | <b>3.4</b>  | <b>1.3–8.6</b>   | 3         | <b>7.4</b>  | 0.8–70.8         | 5                              | <b>1.4</b> | 0.5–4.1 |
| 21- <26                       | 8         | <b>6.0</b>  | <b>2.2–16.1</b>  | 1         | <b>4.3</b>  | 0.3–68.7         | 1                              | <b>0.5</b> | 0.1–4.0 |
| 26- <31                       | 5         | <b>3.0</b>  | 1.0–9.2          | 8         | <b>22.0</b> | <b>2.7–177.4</b> | 4                              | <b>1.3</b> | 0.4–4.2 |
| ≥31                           | 7         | <b>6.6</b>  | <b>2.3–18.8</b>  | 5         | <b>18.5</b> | <b>2.1–161.0</b> | 0                              | --         | --      |

\*All models unadjusted.

†Low cut-points based on quintiles of duration of employment for the entire cohort.

‡ Due to zero cases in the referent group and few cases in the second and third quintiles, the first three quintiles have been collapsed to form a single referent category.

§ High cut-points based on quintiles of duration of employment for all liver cancers in the entire cohort

Abbreviations: n, number; HR, hazard ratio; CI, confidence interval; ref, referent.
